# Supplementary material for: Management of cataracts and ectopia lentis in children: Practice patterns of pediatric ophthalmologists in India
Source: PubMed Central journal article supplement — Indian J Ophthalmol. 2017 Sep;65(9):818–25. doi: 10.4103/ijo.IJO_896_16 (PMC5621263; doi:10.4103/ijo.ijo_896_16), 2017-09
Supplement: IJO-65-818_Suppl1.pdf [file IJO-65-818_Suppl1.pdf]

## Annexure

### Annexure 1

#### Questionnaire

Kindly think in terms of your routine clinical practice to answer the following questions.  
All these questions pertain to lens anomalies in children.

1. Duration and place of practising pediatric ophthalmology sub-speciality

|            | Private | Trust based | Medical college | Institute |
|------------|---------|-------------|-----------------|-----------|
| <5 years   |         |             |                 |           |
| 5-10 years |         |             |                 |           |
| >10 years  |         |             |                 |           |

2. In unilateral cataract, which procedure would you choose to do?

|              | Lens aspiration + PPC + anterior vitrectomy | Lens aspiration + PPC + anterior vitrectomy + PCIOL | Lens aspiration + PCIOL | Lens aspiration only |
|--------------|---------------------------------------------|-----------------------------------------------------|-------------------------|----------------------|
| <6 months    |                                             |                                                     |                         |                      |
| 6-12 months  |                                             |                                                     |                         |                      |
| 12-24 months |                                             |                                                     |                         |                      |
| >24 months   |                                             |                                                     |                         |                      |

3. In bilateral cataract, which procedure would you choose to do?

|              | Lens aspiration + PPC + anterior vitrectomy | Lens aspiration + PPC + anterior vitrectomy + PCIOL | Lens aspiration + PCIOL | Lens aspiration only |
|--------------|---------------------------------------------|-----------------------------------------------------|-------------------------|----------------------|
| <6 months    |                                             |                                                     |                         |                      |
| 6-12 months  |                                             |                                                     |                         |                      |
| 12-24 months |                                             |                                                     |                         |                      |
| >24 months   |                                             |                                                     |                         |                      |

4. If you insert an IOL, then how do you calculate the IOL power?

|           | Aim for emmetropia | Under-correct by 20% or more | Under-correct by 10% |
|-----------|--------------------|------------------------------|----------------------|
| <2 years  |                    |                              |                      |
| 2-8 years |                    |                              |                      |
| >8 years  |                    |                              |                      |

5. Choice of IOL

|                                       |
|---------------------------------------|
| 3 piece hydrophobic acrylic lens      |
| Single piece hydrophobic acrylic lens |
| 3 piece PMMA                          |
| Single piece PMMA                     |
| Toric                                 |
| 3 piece hydrophilic                   |
| Single piece hydrophilic              |
| Multifocal                            |

- 6. Do you prescribe glasses after surgery?  
Yes  
No
- 7. Do you advice amblyopia treatment (Patching) after surgery?  
Yes  
No
- 8. Would you insert an IOL in a child with microcornea and cataract?  
Yes  
No
- 9. How many cases of ectopia lentis (approximately) do you see in a year? Enter the number below
- 10. Which would be the procedure of your choice in a child with ectopia lentis?

|            | Pars plana lensectomy with anterior vitrectomy | Lensectomy with anterior vitrectomy from anterior approach | Use capsular tension ring/capsular tension segment to stabilize the bag and insert PCIOL | Scleral fixated IOL | Iris fixated IOL |
|------------|------------------------------------------------|------------------------------------------------------------|------------------------------------------------------------------------------------------|---------------------|------------------|
| Unilateral |                                                |                                                            |                                                                                          |                     |                  |
| Bilateral  |                                                |                                                            |                                                                                          |                     |                  |
